# Supplementary material
Source: publisher site journal article supplement (https://www.dovepress.com/article/187596)
Supplement: Supplementary file 1 [file get_supplementary_file.php]

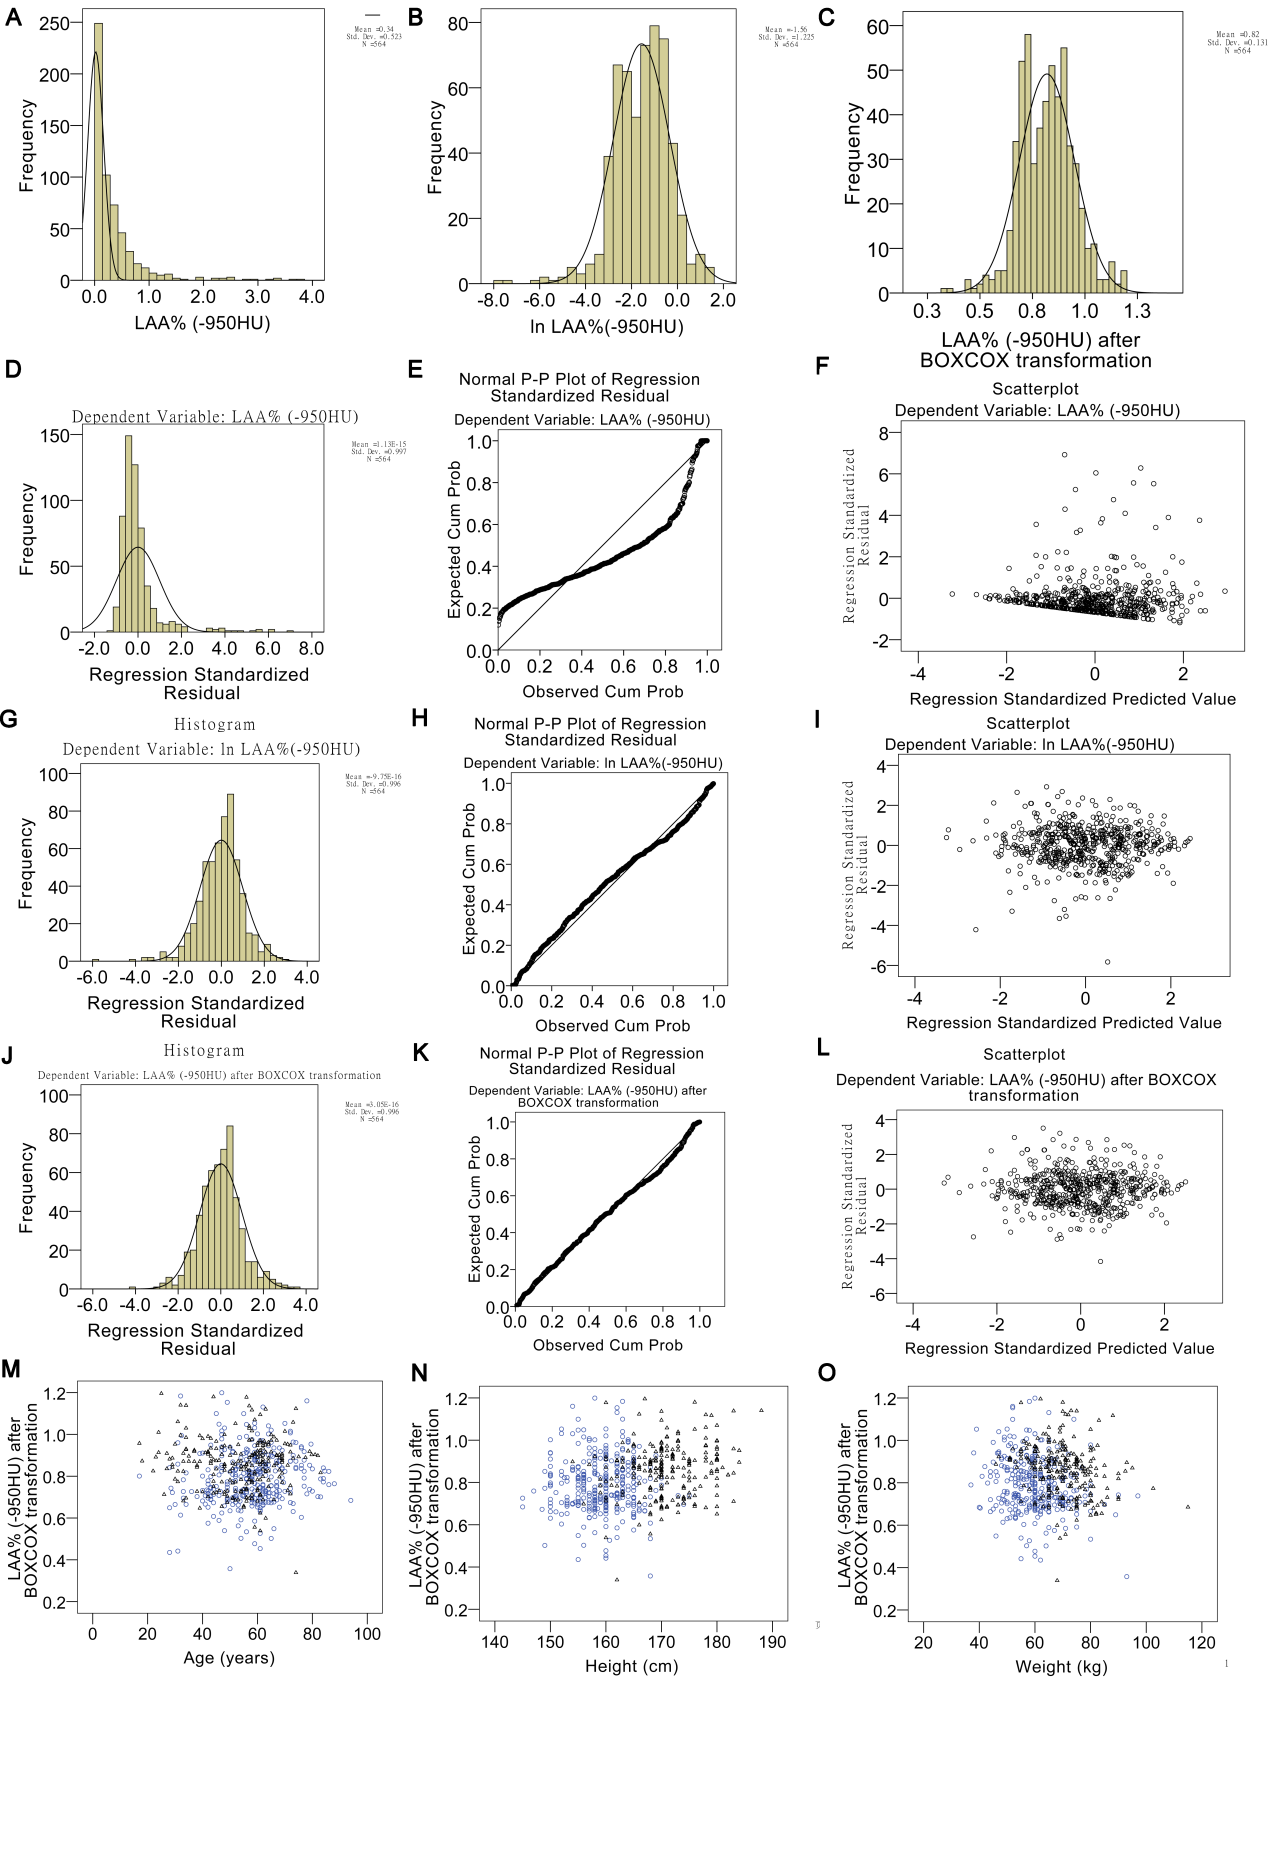


Supplemental Figure 1

A. The histogram of LAA% (-950HU) orgin data.

B. The histogram of natural logarithm of LAA% (-950HU).

C. The histogram of BOXCOX transformed LAA% (-950HU).

D. Histogram of standardized residual of regression for LAA% (-950HU).

E. Normal probability plot of standardized residual of regression for LAA% (-950HU).

F. Scatter plot of standardized residual vs. predicted value of regression for LAA% (-950HU).

G. Histogram of standardized residual of regression for natural logarithm of LAA% (-950HU).

H. Normal probability plot of standardized residual of regression for natural logarithm of LAA% (-950HU).

I. Scatter plot of standardized residual vs. predicted value of regression for natural logarithm of LAA% (-950HU).

J. Histogram of standardized residual of regression for BOXCOX transformed LAA% (-950HU).

K. Normal probability plot of standardized residual of regression for BOXCOX transformed LAA% (-950HU).

L. Scatter plot of standardized residual vs. predicted value of regression for BOXCOX transformed LAA% (-950HU).

M. Scatter plot of BOXCOX transformed LAA% (-950HU) vs. age (year).

N. Scatter plot of BOXCOX transformed LAA% (-950HU) vs. height (cm).

O. Scatter plot of BOXCOX transformed LAA% (-950HU) vs. weight (kg).


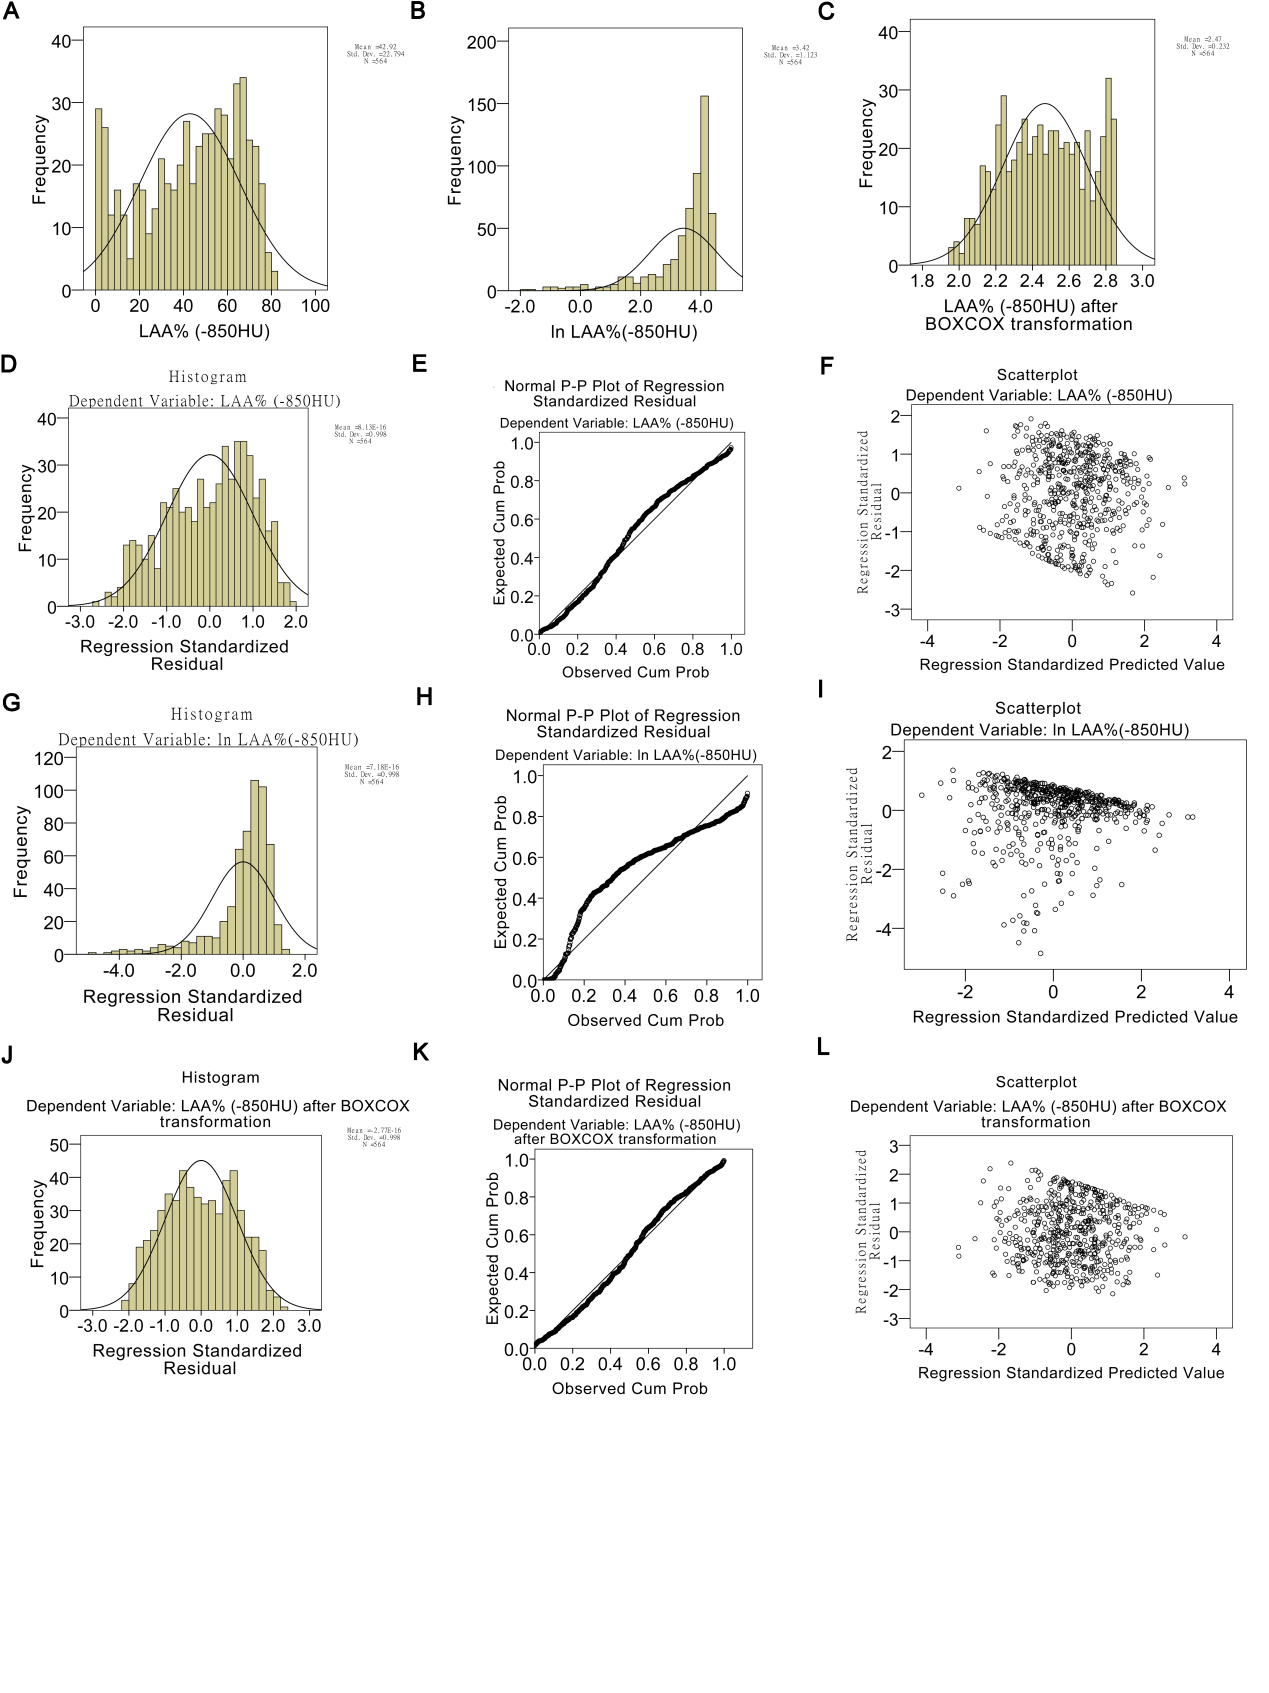


Supplemental Figure 2

A. The histogram of LAA% (-850HU) orgin data.

B. The histogram of natural logarithm of LAA% (-850HU).

C. The histogram of BOXCOX transformed LAA% (-850HU).

D. Histogram of standardized residual of regression for LAA% (-850HU).

E. Normal probability plot of standardized residual of regression for LAA% (-850HU).

F. Scatter plot of standardized residual vs. predicted value of regression for LAA% (-850HU).

G. Histogram of standardized residual of regression for natural logarithm of LAA% (-850HU).

H. Normal probability plot of standardized residual of regression for natural logarithm of LAA% (-850HU).

I. Scatter plot of standardized residual vs. predicted value of regression for natural logarithm of LAA% (-850HU).

J. Histogram of standardized residual of regression for BOXCOX transformed LAA% (-850HU).

K. Normal probability plot of standardized residual of regression for BOXCOX transformed LAA% (-850HU).

L. Scatter plot of standardized residual vs. predicted value of regression for BOXCOX transformed LAA% (-850HU).


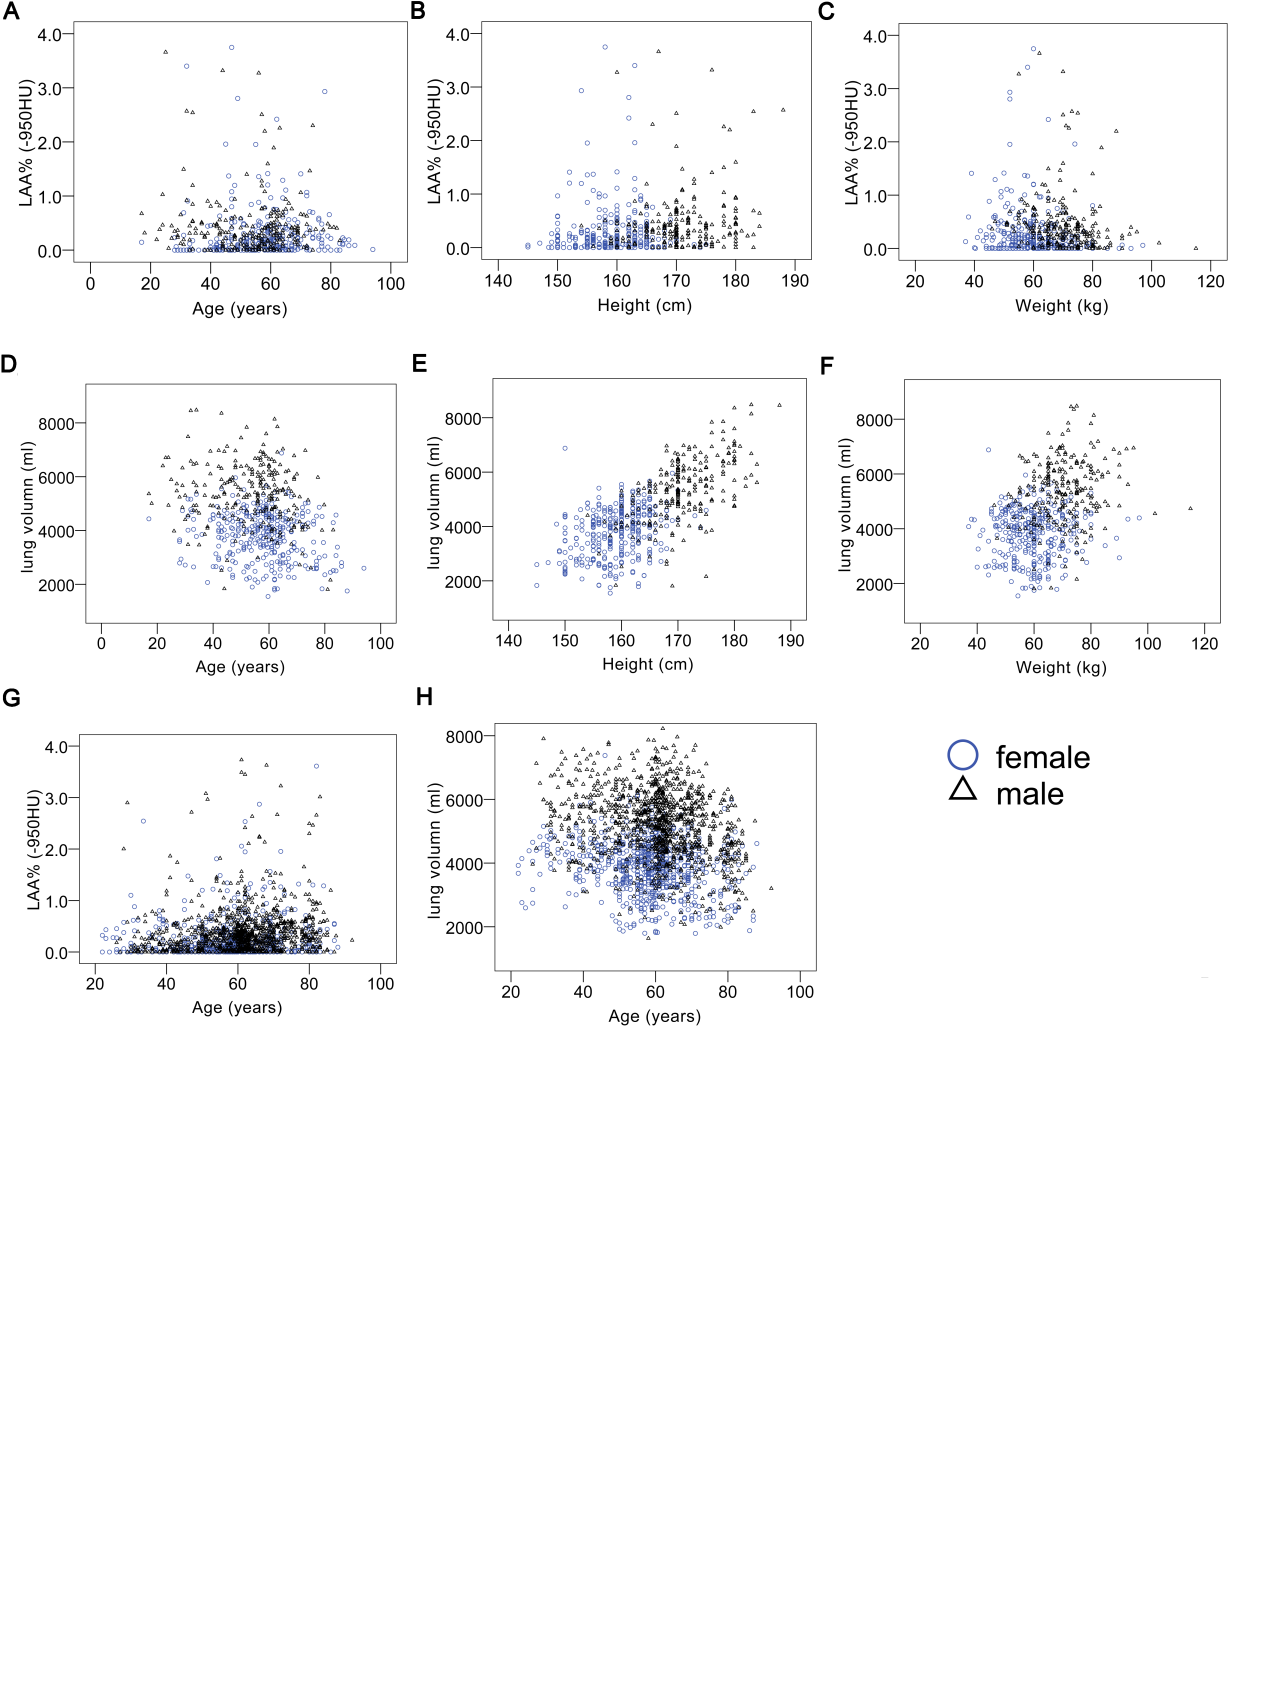


Supplemental Figure 3

Scatter plots of CT lung volume and LAA% (-950HU) vs. age, height and weight. A-F are for derivation group, G-H are for external validation group.
